# Supplementary material for: The Ubiquitin Ligase CBLC Maintains the Network Organization of the Golgi Apparatus
Source: PubMed Central journal article supplement (PMC4579092; doi:10.1371/journal.pone.0138789), 2015-09-22
Supplement: pone.0138789.s002.pdf [file pone.0138789.s002.pdf]

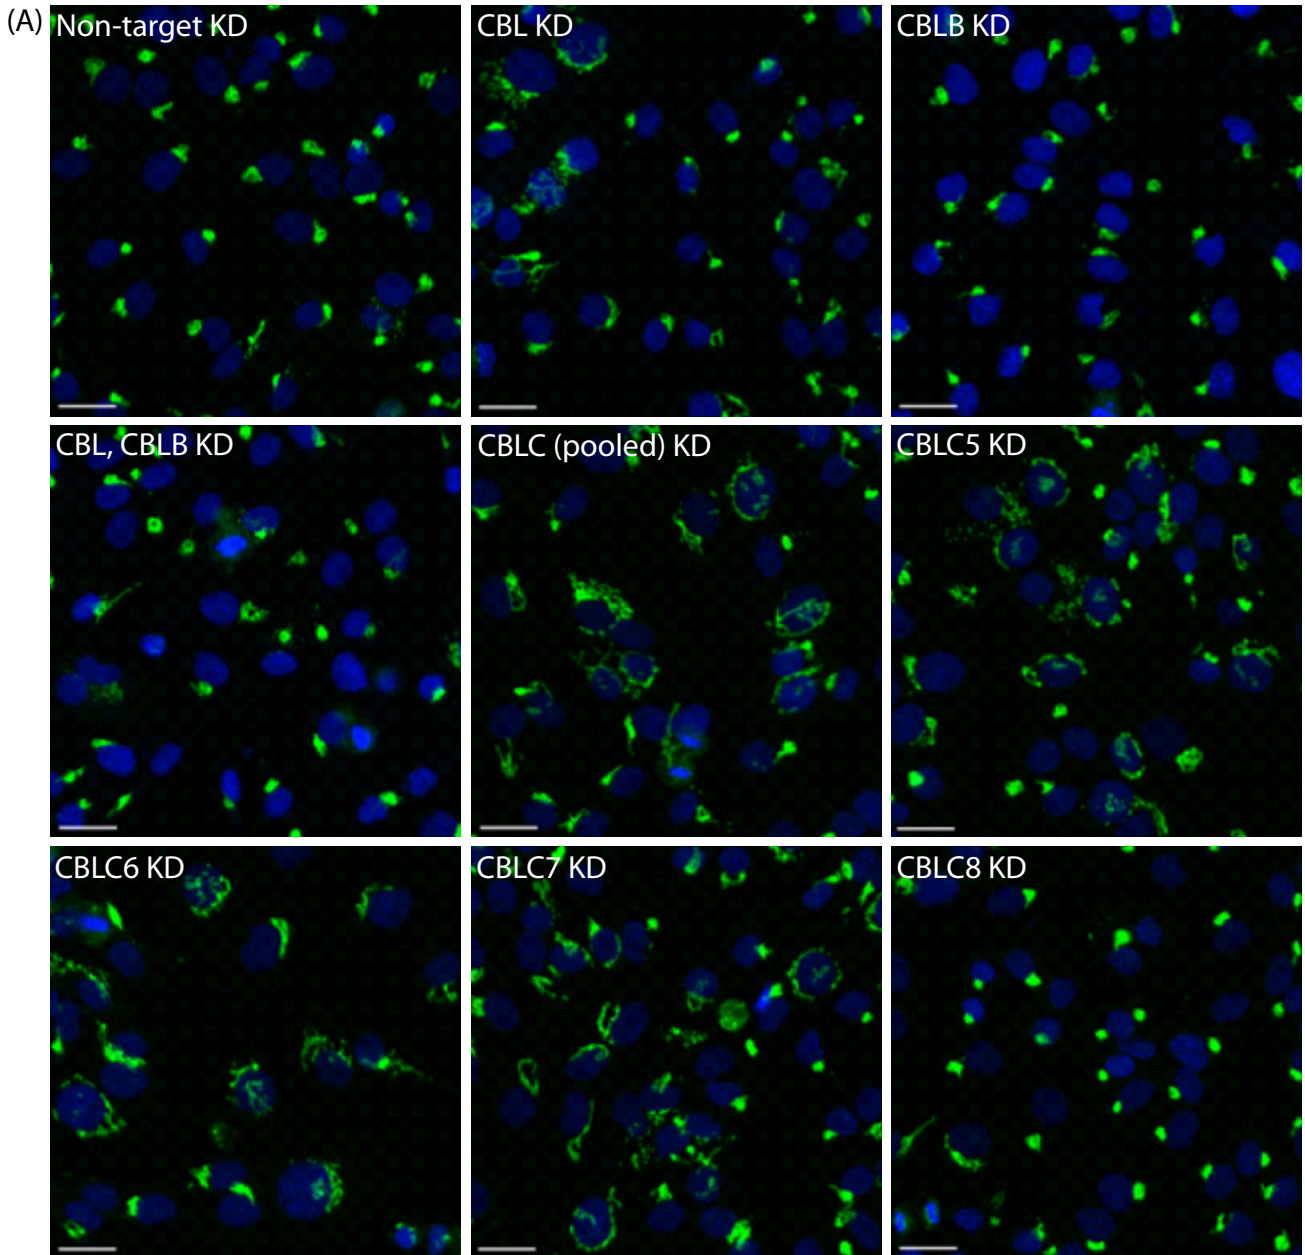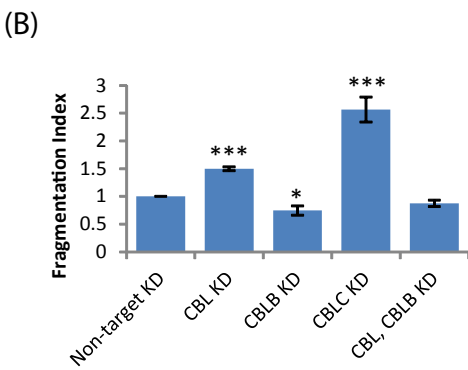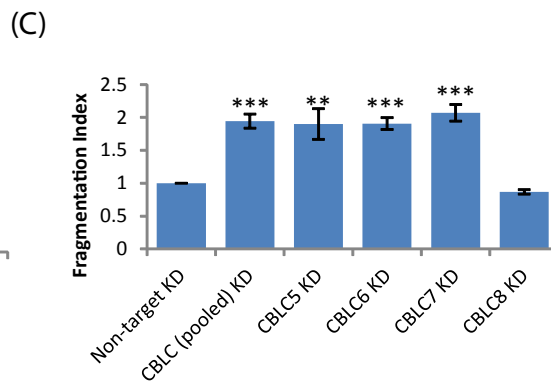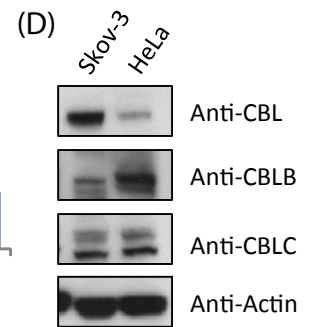

Supplementary Figure 2
